# Supplementary material for: Construction of a multi-dimensional flexible MnS based paper electrode with ultra-stable and high-rate capability towards efficient sodium storage
Source: Royal Society of Chemistry journal article supplement (doi:10.1039/c9nr09903d), 2020-01-01
Supplement: c9nr09903d1.pdf [file c9nr09903d1.pdf]

**Supplementary information for:**

**Construction of multi-dimensional flexible MnS based paper  
electrode with ultra-stable and high-rate capability towards efficient  
sodium storage**

Zehang Sun,<sup>a</sup> Yang Liu,<sup>a</sup> Dongxu Wu, Ke Tan, Linrui Hou and Changzhou Yuan\*

School of Materials Science & Engineering, University of Jinan, Jinan, 250022, P. R.

China

E-mail: mse\_yuancz@ujn.edu.cn; ayuancz@163.com

<sup>a</sup> The authors contributed equally to this work.

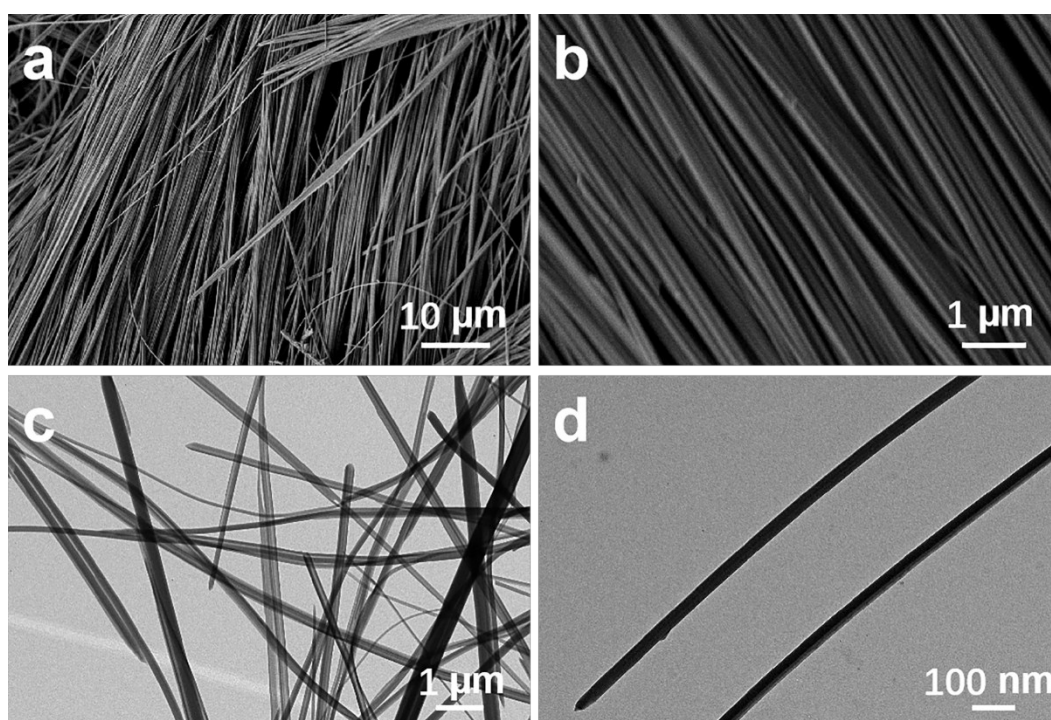

**Fig. S1** (a, b) FESEM and (c, d) TEM images of the Mn-NTA precursor

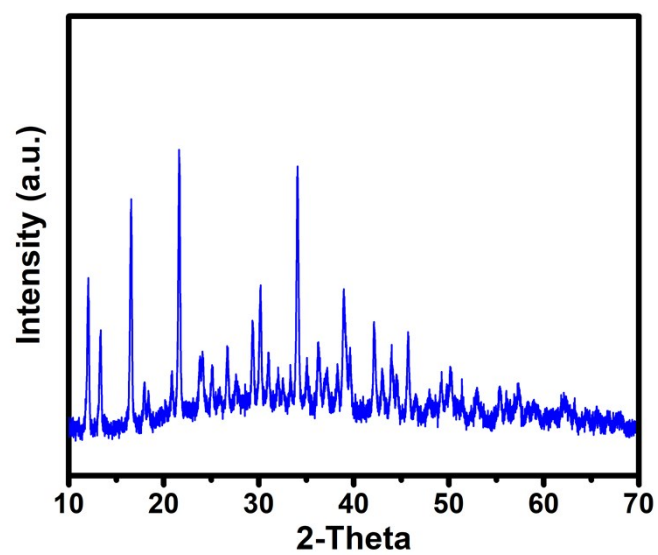

**Fig. S2** XRD pattern of the Mn-CPNWs

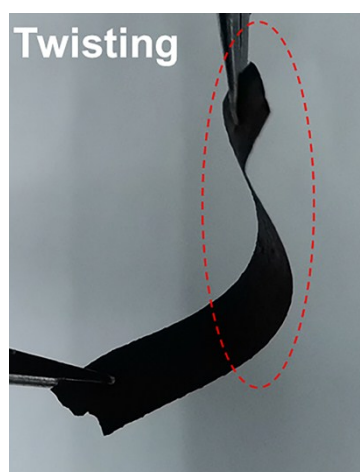

**Fig. S3** Digital images for the twisting of MnS@CNWs/rGO paper

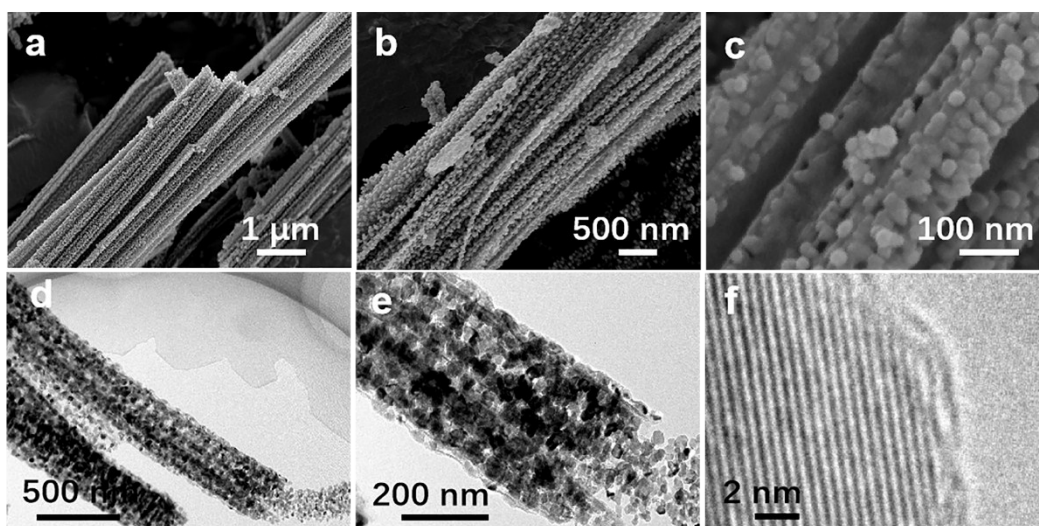

**Fig. S4** (a – c) FESEM, (d, e) TEM and (f) HRTEM images of the MnS@CNWs

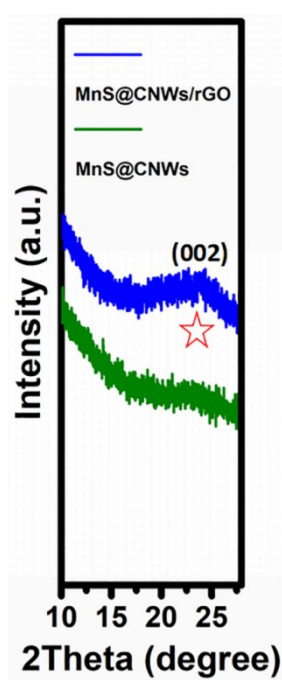

**Fig. S5** Enlarged XRD pattern ( $2\theta = 10 - 27.5^\circ$ ) of the MnS@CNWs/rGO and MnS@CNWs

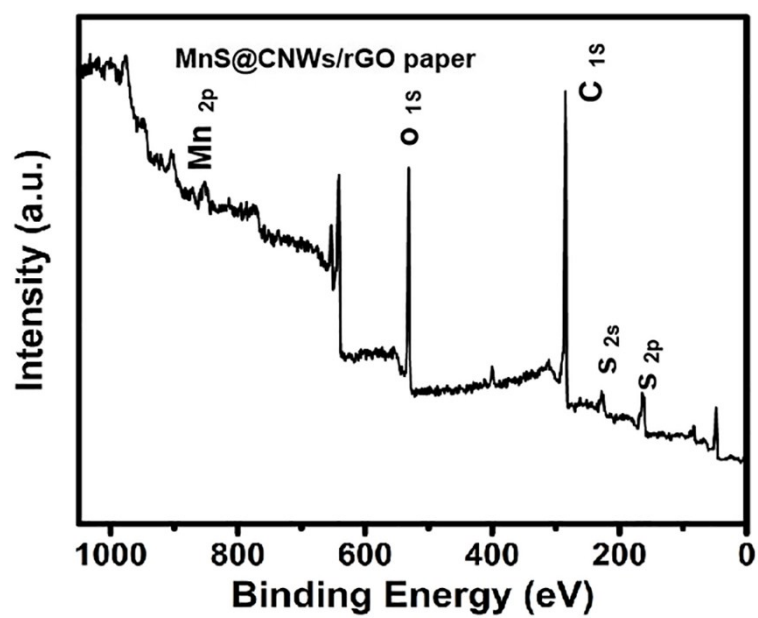

**Fig. S6** XPS survey spectrum of the MnS@CNWs/rGO

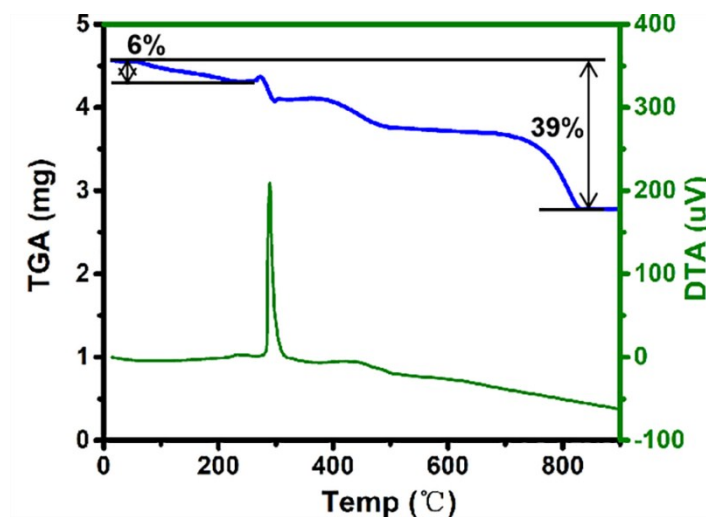

**Fig. S7** TG and DTA curves of the MnS@CNWs/rGO

In the TG curve of MnS@CNWs/rGO, a small weight loss of about 6 wt% first occurred below 100 °C because of the removal of adsorbed water on the surface of the MnS@C/rGO. Subsequently, another weight loss took place between 280 and 500 °C. It is believed that both carbon burning and MnS oxidation (transform into MnSO<sub>3</sub> and Mn<sub>3</sub>O<sub>4</sub>) occurred between 280 and 500 °C, which is consistent with previous reports.<sup>1</sup> After a plateau region, sharp weight loss was observed as the temperature increase from 700 °C to 850 °C owing to further oxidation of MnSO<sub>3</sub> and Mn<sub>3</sub>O<sub>4</sub> to Mn<sub>2</sub>O<sub>3</sub>. Based on the TGA results, the weight contents of MnS and carbon were calculated to be 71.8 wt.% and 28.2 wt.%.



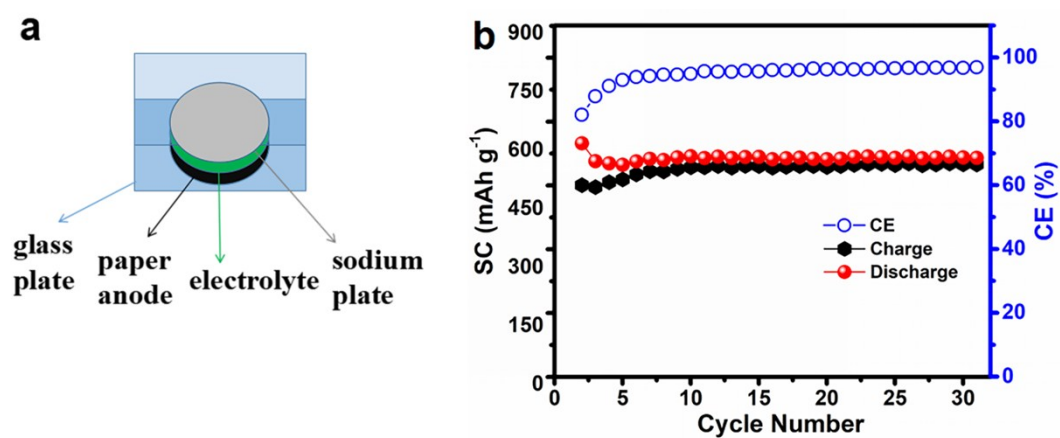

**Fig. S8** (a) Schematic illustration and (b) cycling performance (100 mA g<sup>-1</sup>) for the pre-sodiation of MnS@CNWs/rGO paper

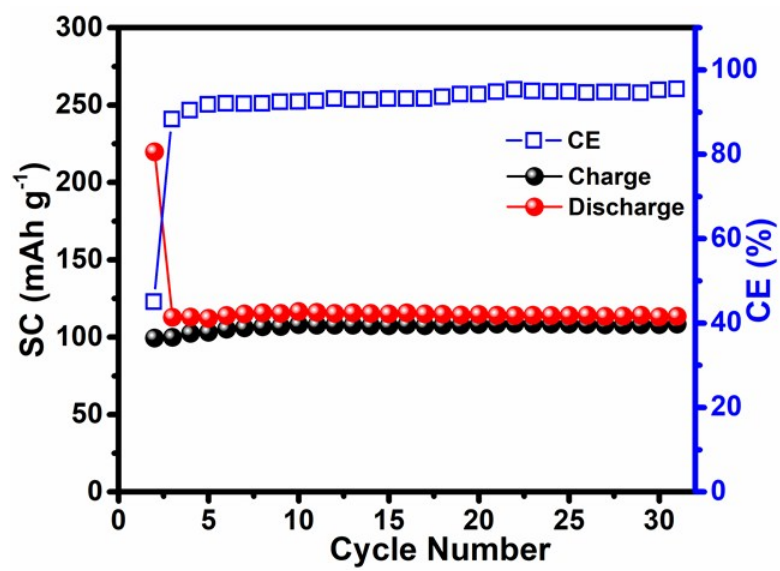

**Fig. S9** Cycling performance for the pure rGO paper at a current density of 100 mA g<sup>-1</sup>

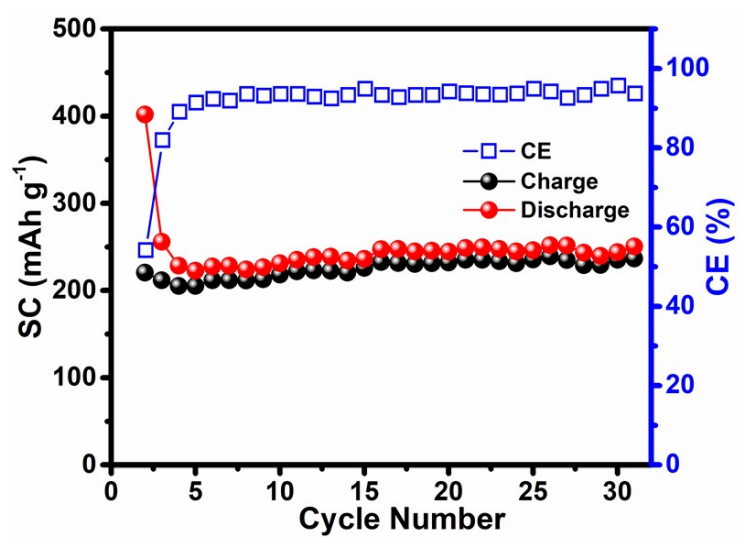

**Fig. S10** Cycling performance for the MnS@CNWs/4rGO paper at a current density of  $100 \text{ mA g}^{-1}$

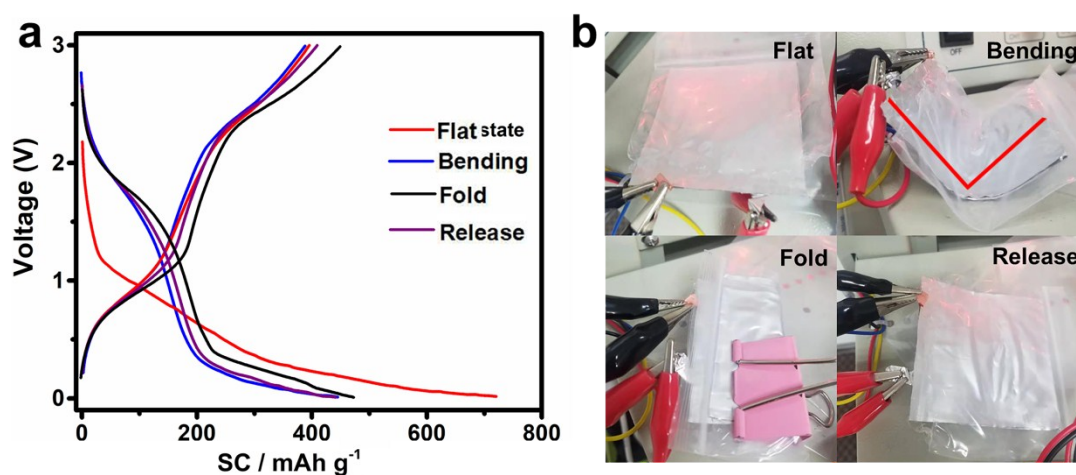

**Fig. S11** (a) Typical galvanostatic discharge-charge plots ( $100 \text{ mA g}^{-1}$ ) for (b) the soft package of half sodium ion cells in different flexible modes. The area of the MnS@CNWs/4rGO paper is  $\sim 4 \text{ cm}^2$

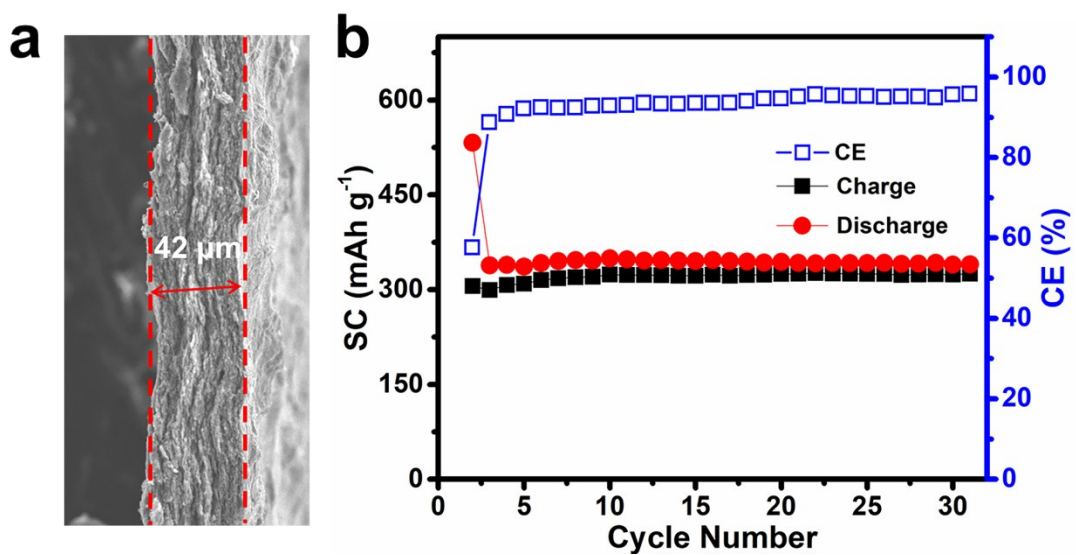

**Fig. S12** (a, b) The thickness and cycling performance ( $100 \text{ mA g}^{-1}$ ) for the MnS@CNWs/rGO paper of  $3.8 \text{ mg cm}^{-2}$

**Table S1** The comparison between this work and other sulfide self-supporting anodes for SIBs

| Anode                                                       | Volumetric (areal) capacities                         | Mass loading (mg cm <sup>-2</sup> ) | Rate capability                                       | Cycling stability                                                       | Ref.      |
|-------------------------------------------------------------|-------------------------------------------------------|-------------------------------------|-------------------------------------------------------|-------------------------------------------------------------------------|-----------|
| FeS/SPAN-HNF                                                | —                                                     | 1.5- 2.0                            | 782.8 at 0.2 A g <sup>-1</sup>                        | 327.5 at 5.0 A g <sup>-1</sup> after 500 cycles                         | 2         |
| Fe <sub>1-x</sub> S@PCNWs/rGO                               | 424 mAh cm <sup>-3</sup> at 0.2 A g <sup>-1</sup>     | 0.9- 11.2                           | 180 mAh cm <sup>-3</sup> at 5 A g <sup>-1</sup>       | 573 at 100 mA g <sup>-1</sup> after 100 cycles                          | 3         |
| 3D carbon-networks/Fe <sub>7</sub> S <sub>8</sub> /graphene | 2.12 mAh cm <sup>-2</sup> at 0.25 mA cm <sup>-2</sup> | —                                   | 1.12 mAh cm <sup>-2</sup> at 10.0 mA cm <sup>-2</sup> | 1.064 mAh cm <sup>-2</sup> at 10.0 mA cm <sup>-2</sup> after 500 cycles | 4         |
| MWCNT and In <sub>2</sub> S <sub>3</sub> nanohybrid paper   | —                                                     | 1.8                                 | 280 at 1.0 A g <sup>-1</sup>                          | 410 at 100 mA g <sup>-1</sup> after 100 cycles                          | 5         |
| SnS/C NFs                                                   | —                                                     | —                                   | 230 at 2.0 A g <sup>-1</sup>                          | 349 at 200 mA g <sup>-1</sup> after 500 cycles                          | 6         |
| MoS <sub>2</sub> -F                                         | —                                                     | 1.0-1.2                             | 186 at 2.0 A g <sup>-1</sup>                          | 243 at 1000 mA g <sup>-1</sup> after 1100 cycles                        | 7         |
| MnS@CNF                                                     | —                                                     | 1.25                                | 87 at 1.0 A g <sup>-1</sup>                           | 220 at 20 mA g <sup>-1</sup> after 200 cycles                           | 8         |
| α -MnS@N,S-NTC                                              | —                                                     | 1.5                                 | 188 at 1.0 A g <sup>-1</sup>                          | 291 at 250 mA g <sup>-1</sup> after 200 cycles                          | 9         |
| MnS@CNWs/rGO                                                | 362.3 mAh cm <sup>-3</sup> at 0.1 A g <sup>-1</sup>   | 1.0-3.8                             | 147 at 2.0A g <sup>-1</sup>                           | ≈150mA h g <sup>-1</sup> at 1000 mA g <sup>-1</sup> after 10000 cycles; | This work |

Note: — : not provided; MoS<sub>2</sub>-F: MoS<sub>2</sub> and CNFs overall composite electrode

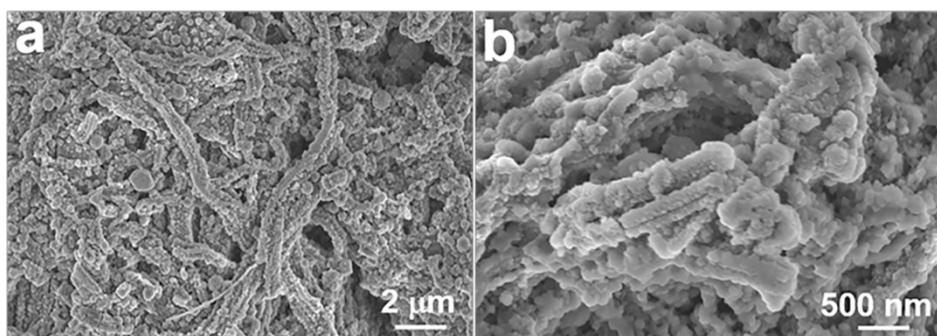

**Fig. S13** (a, b) FESEM images of the MnS@CNWs/rGO paper electrode after 50 cycle at current density of  $0.1 \text{ A g}^{-1}$

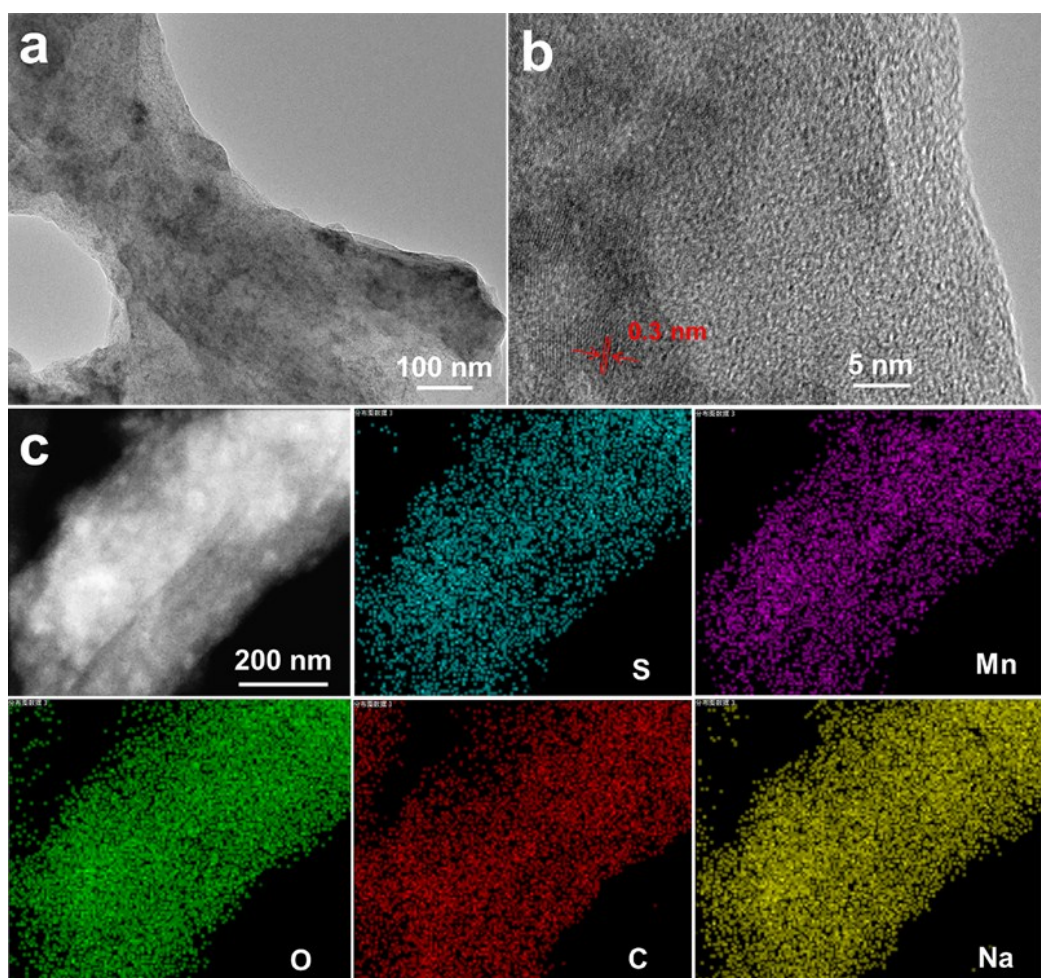

**Fig. S14** (a, b) TEM and (c) STEM images of the MnS@CNWs/rGO paper electrode after 50 cycle at current density of  $100 \text{ mA g}^{-1}$



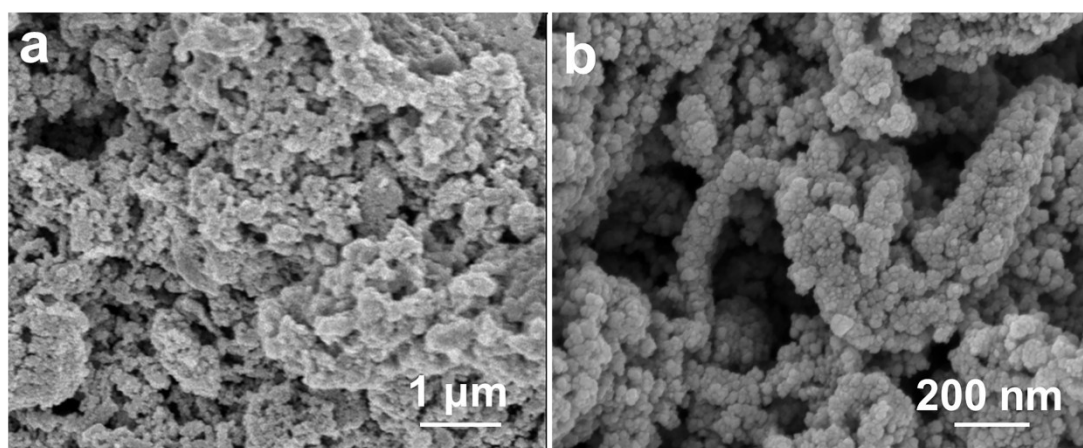

**Fig. S15** (a, b) FESEM images of the MnS@CNWs electrode after 50 cycle at current density of  $0.1 \text{ A g}^{-1}$

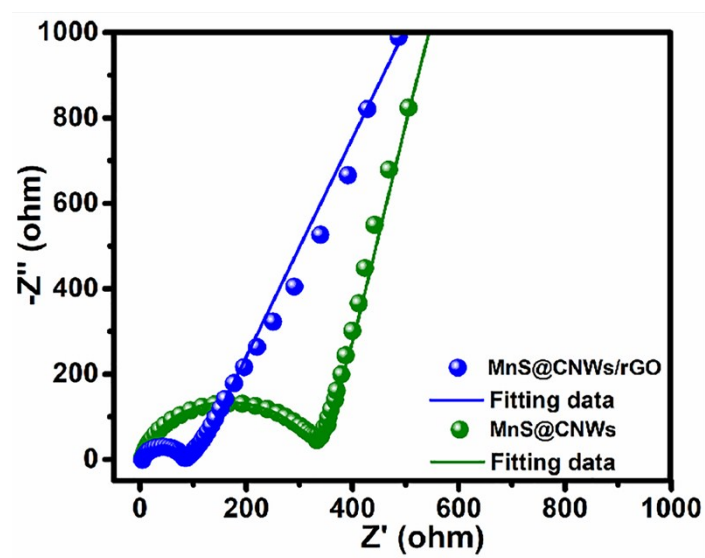

**Fig. S16** EIS spectra of the MnS@CNWs/rGO and MnS@CNWs electrodes

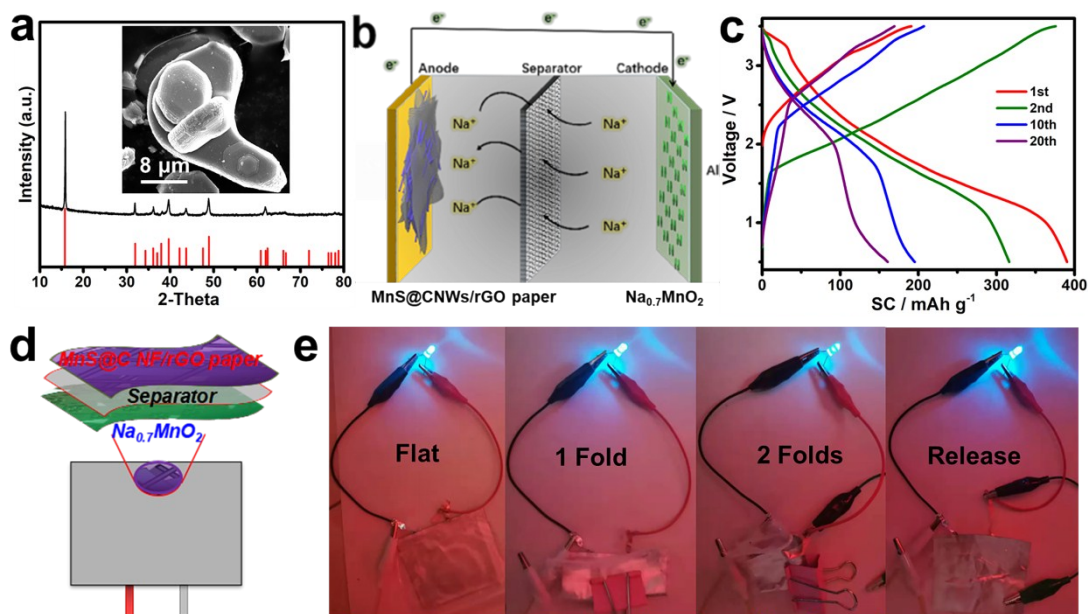

**Fig. S17** (a) XRD pattern and FESEM image (the inset) for the cathode Na<sub>0.7</sub>MnO<sub>2</sub>; (b) Schematic illustration and (c) galvanostatic discharge-charge plots (100 mA g<sup>-1</sup>) of the manganese-based full SIB; (d) Schematic demonstration and (e) digital pictures of the pouch-type devices in different flexible modes. The areas of the MnS@CNWs/rGO paper and the cathode Na<sub>0.7</sub>MnO<sub>2</sub> are ~4 and ~6 cm<sup>2</sup>, respectively

## References

1. X. Xu, S. Ji, M. Gu, and J. Liu, *ACS Appl. Mater. Interfaces*, 2015, **7**, 20957-20964.
2. J. Zhang, K. Zhang, J. Yang, G.-H. Lee, J. Shin, V. W. Lau and Y. M. Kang, *Adv. Energy. Mater.*, 2018, **8**, 1800283.
3. Y. Liu, Y. Fang, Z. Zhao, C. Yuan and X. W. Lou, *Adv. Energy Mater.*, 2019, **9**, 1803052.
4. W. Chen, X. Zhang, L. Mi, C. Liu, J. Zhang, S. Cui, X. Feng, Y. Cao and C. Shen, *Adv. Mater.*, 2019, **31**, 1806664.
5. J. Choi, Y. Myung and S. K. Kim, *Appl. Surf. Sci.*, 2019, **467-468**, 1040-1045.
6. J. Xia, L. Liu, S. Jamil, J. Xie, H. Yan, Y. Yuan, Y. Zhang, S. Nie, J. Pan, X. Wang and G. Cao. *Energy Storage Mater.*, 2019, **17**, 1-11.
7. Q. Ni, Y. Bai, S. Guo, H. Ren, G. Chen, Z. Wang, F. Wu and C. Wu, *ACS Appl. Mater. Interfaces*, 2019, **11**, 5183–5192.
8. S. Gao, G. Chen, Y. DaliAgnese, Y. Wei, Z. Gao and Y. Gao, *Chem. Eur. J.*, 2018, **24**, 13535-13539.
9. D. H. Liu, W. H. Li, Y. P. Zheng, Z. Cui, X. Yan, D. S. Liu, J. Wang, Y. Zhang, H. Y. Lu, F. Y. Bai, J. Z. Guo and X. L. Wu, *Adv. Mater.*, 2018, **30**, 1706317.
